# Supplementary material
Source: ML conference proceedings conference paper supplement (https://openaccess.thecvf.com/content/ICCV2025/html/Wang_Disentangled_World_Models_ICCV_2025_paper.html)
Supplement: Supplementary file 1 [file Wang_Disentangled_World_Models_ICCV_2025_supplemental.pdf]

# Disentangled World Models: Learning to Transfer Semantic Knowledge from Distracting Videos for Reinforcement Learning

## Supplementary Material

### A. Compared Baselines

We compare DisWM with strong visual RL agents, including

- **DreamerV2** [10]: A model-based RL (MBRL) approach that trains world model and learns by imagining future latent states.
- **APV** [29]: It learns informational representations via action-free pretraining on videos and finetunes the agent with learned representations in the downstream tasks with action.
- **DV2 Finetune**: It pretrains a DreamerV2 agent [10] on distracting videos and then finetunes the trained model in the downstream tasks. Note that some tasks have different action spaces, which makes it difficult to finetune directly. Therefore, the action space of two tasks is set as the maximum action space of both environments.
- **TED** [7]: It adopts a classification task to learn temporally disentangled representations in visual RL.
- **CURL** [18]: A model-free RL method that employs contrastive learning to improve its sample efficiency.

### B. Behavior Learning

For the behavior learning of DisWM, we adopt the actor-critic method following DreamerV2 [10]. Concretely, the actor and critic are both implemented as MLPs with ELU activations [5]. Formally, the actor and critic are defined as below:

$$\begin{aligned} \text{Actor: } \hat{a}_t &\sim \pi_\psi(\hat{a}_t | \hat{z}_t) \\ \text{Critic: } v_\xi(\hat{z}_t) &\approx \mathbb{E}_{p_\phi, p_\psi} \left[ \sum_{\tau \geq t} \hat{\gamma}_{\tau-t} \hat{r}_\tau \right]. \end{aligned} \quad (6)$$

The actor  $\pi_\psi$  is optimized by maximizing

$$\begin{aligned} \mathcal{L}(\psi) = \mathbb{E}_{p_\phi, p_\psi} \left[ \sum_{t=1}^{H-1} \left( \underbrace{\beta \mathbb{H}[a_t | \hat{z}_t]}_{\text{entropy regularization}} + \underbrace{\rho V_t}_{\text{dynamics backprop}} \right) \right. \\ \left. + \underbrace{(1 - \rho) \ln \pi_\psi(\hat{a}_t | \hat{z}_t) \text{sg}(V_t - v_\xi(\hat{z}_t))}_{\text{REINFORCE}} \right]. \end{aligned} \quad (7)$$

We train the critic  $v_\xi$  by minimizing

$$\mathcal{L}(\xi) = \mathbb{E}_{p_\phi, p_\psi} \left[ \sum_{t=1}^{H-1} \frac{1}{2} (v_\xi(\hat{z}_t) - \text{sg}(V_t))^2 \right]. \quad (8)$$

where  $\text{sg}$  is a stop gradient operator.

The  $\lambda$ -target  $V_t$  that involves a weighted average of reward information used in Eq. (7) and Eq. (8) is defined as:

$$V_t \doteq \hat{r}_t + \hat{\gamma}_t \begin{cases} (1 - \lambda)v_\xi(\hat{z}_{t+1}) + \lambda V_{t+1} & \text{if } t < H \\ v_\xi(\hat{z}_H) & \text{if } t = H \end{cases}. \quad (9)$$

where  $H$  is the imagination horizon. Notably, the disentangled world model is *not* optimized during behavior learning.

### C. Additional Results

#### C.1. Results on DMC

We compare the performance of *DreamerV3* [12], *TD-MPC2* [13], *ContextWM* [39], and our approach on DMC. As shown **Table A**, DisWM outperforms other strong baselines in terms of episode return.

#### C.2. Results on DrawerWorld

We present results on DrawerWorld [37] in **Table B**. As reported in **Table B**, DisWM (source: *Finger Spin*) outperforms other baselines in terms of success rate (%) on all tasks.

#### C.3. Sensitivity of the Latent Space Dimension

We visualize sensitivity analyses on the latent space dimension in Figure I. We observe that when  $\mathbf{z}_{\text{dim}}$  for the  $\beta$ -VAE is too small, it impedes the learning of disentangled representations, leading to a decline in performance.

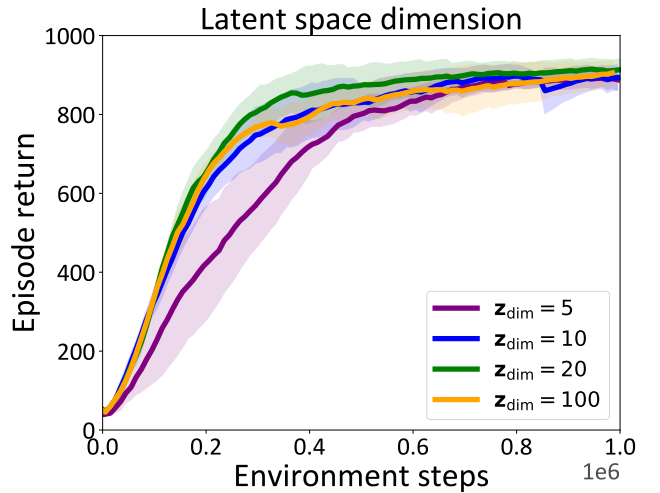

Figure I. Sensitivity analyses on *Cheetah Run*  $\rightarrow$  *Walker Walk*

| Model     | <i>Reacher Easy</i> → <i>Cheetah Run</i> | <i>Walker Walk</i> → <i>Humanoid Walk</i> |
|-----------|------------------------------------------|-------------------------------------------|
| DreamerV3 | 662 ± 9                                  | 12 ± 17                                   |
| TD-MPC2   | 510 ± 15                                 | 1 ± 0                                     |
| ContextWM | 661 ± 49                                 | 1 ± 0                                     |
| DisWM     | <b>817 ± 59</b>                          | <b>147 ± 85</b>                           |

Table A. Comparison with strong baselines on DMC.

| Model     | DrawerClose   | DrawerOpen     |
|-----------|---------------|----------------|
| TDMPC2    | 3 ± 6         | 43 ± 25        |
| ContextWM | 37 ± 12       | 23 ± 25        |
| DisWM     | <b>77 ± 6</b> | <b>70 ± 10</b> |

Table B. Performance on DrawerWorld with texture variations.

### C.4. Runtime Comparisons

We provide the detailed runtime and parameter comparisons with baselines in Table C. Note that the inference time is computed for one episode.

Table C. Runtime and model size comparisons evaluated on DMC (*Finger Spin* → *Reacher Easy*). DV2 FT is short for DreamerV2 finetune.

| Model  | Training Steps | Training time | Inference time | Params (M) |
|--------|----------------|---------------|----------------|------------|
| CURL   | 100k           | 303 min       | 4.97 sec       | 10.7       |
| DV2 FT | 200k           | 1522 min      | 9.88 sec       | 12.1       |
| APV    | 200k           | 1722 min      | 10.15 sec      | 13         |
| TED    | 100k           | 1051 min      | 20.49 sec      | 11.5       |
| DV2    | 100k           | 901 min       | 9.59 sec       | 12.1       |
| DisWM  | 200k           | 1311 min      | 9.48 sec       | 5.8        |

### C.5. Sample Diversity Visualization

The adaptation stage enriches the sample diversity, as shown in Figure J, for *Cheetah Run* → *Walker Walk*, we sample 200 video clips of length 50 and visualize the corresponding latent features using t-SNE [25]. We find that the latent features of the online interactions are more diverse than those of the offline dataset.

## D. Hyperparameters

The final hyperparameters of DisWM are reported in Table D.

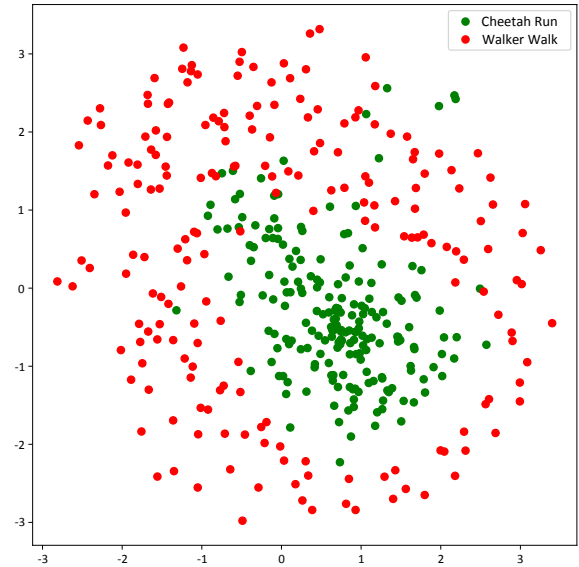

Figure J. Sample diversity enhanced by adaptation.

Table D. Hyperparameters of DisWM.

| Name                       | Notation  | Value             |
|----------------------------|-----------|-------------------|
| Video prediction model     |           |                   |
| Image size                 | —         | 64 × 64           |
| KL divergence scale        | $\beta_1$ | 1                 |
| Disentanglement scale      | $\beta_2$ | 0.015             |
| Latent dimension           | —         | 20                |
| Learning rate              | —         | $3 \cdot 10^{-4}$ |
| Disentangled World Model   |           |                   |
| Latent distillation weight | $\eta$    | 0.1               |
| Disentanglement scale      | $\beta$   | 0.015             |
| KL divergence scale        | $\alpha$  | 1                 |
| Latent dimension           | —         | 20                |
| Batch size                 | $B$       | 50                |
| Batch length               | $L$       | 50                |
| Learning rate              | —         | $3 \cdot 10^{-4}$ |
| Behavior Learning          |           |                   |
| Imagination horizon        | $H$       | 15                |
| Discount                   | $\gamma$  | 0.99              |
| $\lambda$ -target          | $\lambda$ | 0.95              |
| Actor learning rate        | —         | $8 \cdot 10^{-5}$ |
| Critic learning rate       | —         | $8 \cdot 10^{-5}$ |
